# Supplementary material for: Deep Sequencing of T-cell Receptor DNA as a Biomarker of Clonally Expanded TILs in Breast Cancer after Immunotherapy
Source: Oxford University Press journal article supplement (doi:10.1158/2326-6066.cir-16-0013), 2016-09-01
Supplement: 23266066cir160013-sup-161401_2_supp_3841646_ckg5kq.xlsx [file 23266066cir160013-sup-161401_2_supp_3841646_ckg5kq.xlsx]

## Sheet: Sheet1
			Supplementary Table 1: TCRB sequencing sample IDs
			Patient ID	Core Bx	Mastectomy	Duplicate Core Bx	Duplicate Mastectomy	PBMC Timepoint A	PBMC Timepoint B	PBMC Timepoint C	PBMC Timepoint D
			1	44_11-202-1AT	45_T45_11-202-1BCT		45_11-202-1BCT		BC-41_11-202-1BB	BC-42_11-202-1CB	BC-43_11-202-1DB
			2	49_T49_11-202-2AT_IMF-BC-2A	50_11-202-2BCT			BC-44_11-202-2AB	BC-45_11-202-2BB	BC-46_11-202-2CB
			3	53_T53_11-202-3AT	54_T54_11-202-3BCT		54_11-202-3BCT	47_11-202-3AB	BC-48_11-202-3BB	BC-49_11-202-3CB	BC-50_11-202-3DB
			4	58_11-202-4AT	59_11-202-4BCT			BC-51_11-202-4AB	BC-52_11-202-4BB	BC-53_11-202-4CB	154_11-202-4DB
			5	63_11-202-5AT	64_11-202-5BCT			54_11-202-5AB	BC-55_11-202-5BB	BC-56_11-202-5CB	BC-57_11-202-5DB
			6	67_11-202-6AT	68_11-202-6BCT	67_T67_11-202-6AT		58_11-202-6AB	BC-59_11-202-6BB	155_11-202-6CB	BC-60_11-202-6DB
			7	71_11-202-7AT	72_T72_11-202-7BCT		72_11-202-7BCT	61_11-202-7AB	BC-62_11-202-7BB	BC-63_11-202-7CB	BC-64_11-202-7DB
			8	75_11-202-8AT	76_11-202-8BCT			65_11-202-8AB	BC-66_11-202-8BB	BC-67_11-202-8CB	BC-68_11-202-8DB
			9	IMF-BC_9A	81_11-202-9B1CT			69_11-202-9A	70_11-202-9B	132_11-202-9C	133_11-202-9D
			10	88_T88_11-202-10AT_IMF-BC-10A	89_11-202-10BC1T			71_11-202-10A	72_11-202-10B	134_11-202-10C	135_11-202-10D
			11	IMF-BC_11A	92_11-202-11BCT			73_11-202-11A	74_11-202-11B	136_11-202-11C	137_11-202-11D
			12	95_11-202-12AT	96_11-202-12BCT				76_11-202-12B	138_11-202-12C	139_11-202-12D
			13	99_11-202-13AT	100_11-202-13BCT			77_11-202-13A	78_11-202-13B	140_11-202-13C	141_11-202-13D
			14	103_11-202-14AT	104_11-202-14BCT			79_11-202-14A	80_11-202-14B	142_11-202-14C
			15	107_11-202-15AT	108_11-202-15BCT		108_T108_11-202-15BCT	81_11-202-15A	82_11-202-15B	144_11-202-15C	145_11-202-15D
			16	111_11-202-16AT	112_11-202-16BCT		112_T112_11-202-16BCT	83_11-202-16A			147_11-202-16D
			17	115_11-202-17AT	116_11-202-17BCT			85_11-202-17A	86_11-202-17B		149_11-202-17D
			18	119_11-202-18AT	120_11-202-18BCT		120_T120_11-202-18BCT	87_11-202-18A	88_11-202-18B	150_11-202-18C	151_11-202-18D
			19	IMF-BC_19A	124_11-202-19BCT	123_T123_11-202-2AT_IMF-BC-19A	IMF-BC_19B_core	89_11-202-19A	90_11-202-19B	152_11-202-19C
			Data set doi:10.5072/FK26H4K46H; alternatively, data can be accessed at: https://clients.adaptivebiotech.com/pub/page-2016-cir
			Abbreviations: TCRB, T-cell receptor beta; Bx, biopsy; PBMC, peripheral blood mononuclear cell
